# Supplementary material for: Single-factor analysis of Ni–B–AC-catalyzed β-pinene hydrogenation based on hierarchical analysis
Source: Royal Society of Chemistry journal article supplement (doi:10.1039/d2ra05632a), 2022-01-01
Supplement: d2ra05632a1.pdf [file d2ra05632a1.pdf]

## Supplementary Material for:

# Single-factor analysis of Ni-B-AC-catalyzed $\beta$ -pinene hydrogenation: based on hierarchical analysis

Faculty of Chemical Engineering, Kunming University of Science and Technology, No. 727 Jingming South Road<sup>1</sup>

Criteria for Hierarchical Analysis data:

Single-factor investigation of the preparation of Ni-B-AC catalysts

| <b>Reaction Time</b>  | <b>2h</b>               | <b>3h</b>               | <b>5h</b>               | <b>4.5h</b>             | <b>4h</b>               |
|-----------------------|-------------------------|-------------------------|-------------------------|-------------------------|-------------------------|
| <b>2h</b>             | -                       | 22.78%                  | 46.12%                  | 38.16%                  | 63.25%                  |
| <b>3h</b>             | -                       | -                       | 1.24%                   | 15.38%                  | 40.47%                  |
| <b>5h</b>             | -                       | -                       | -                       | 14.14%                  | 39.23%                  |
| <b>4.5h</b>           | -                       | -                       | -                       | -                       | 25.09%                  |
| <b>4h</b>             | -                       | -                       | -                       | -                       | -                       |
| <b>AC/Ni</b>          | <b>1:4</b>              | <b>1:7</b>              | <b>1:5</b>              | <b>1:8</b>              | <b>1:6</b>              |
| <b>1:4</b>            | -                       | 71.42%                  | 12.28%                  | 44.93%                  | 47.35%                  |
| <b>1:7</b>            | -                       | -                       | 59.14%                  | 26.49%                  | 24.07%                  |
| <b>1:5</b>            | -                       | -                       | -                       | 32.65%                  | 35.07%                  |
| <b>1:8</b>            | -                       | -                       | -                       | -                       | 2.42%                   |
| <b>1:6</b>            | -                       | -                       | -                       | -                       | -                       |
| <b>pH</b>             | <b>pH=11</b>            | <b>pH=9</b>             | <b>pH=12</b>            | <b>pH=13</b>            | <b>pH=14</b>            |
| <b>pH=11</b>          | -                       | 12.94%                  | 13.56%                  | 26.51%                  | 3.02%                   |
| <b>pH=9</b>           | -                       | -                       | 26.50%                  | 39.45%                  | 9.92%                   |
| <b>pH=12</b>          | -                       | -                       | -                       | 12.95%                  | 16.58%                  |
| <b>pH=13</b>          | -                       | -                       | -                       | -                       | 29.53%                  |
| <b>pH=14</b>          | -                       | -                       | -                       | -                       | -                       |
| <b>Rates of Drops</b> | <b>45drops/<br/>min</b> | <b>30drops/<br/>min</b> | <b>60drops/<br/>min</b> | <b>50drops/<br/>min</b> | <b>70drops/<br/>min</b> |
| <b>45drops/min</b>    | -                       | 12.03%                  | 5.93%                   | 20.32%                  | 33.16%                  |
| <b>30drops/min</b>    | -                       | -                       | 17.96%                  | 32.35%                  | 21.13%                  |
| <b>60drops/min</b>    | -                       | -                       | -                       | 14.39%                  | 39.09%                  |
| <b>50drops/min</b>    | -                       | -                       | -                       | -                       | 53.48%                  |
| <b>70drops/min</b>    | -                       | -                       | -                       | -                       | -                       |
| <b>Ni/B</b>           | <b>1:3</b>              | <b>1:4</b>              | <b>1:5</b>              | <b>1:6</b>              | <b>1:7</b>              |
| <b>1:3</b>            | -                       | 8.61%                   | 16.85%                  | 30.63%                  | 34.10%                  |
| <b>1:4</b>            | -                       | -                       | 25.46%                  | 39.24%                  | 42.71%                  |
| <b>1:5</b>            | -                       | -                       | -                       | 13.78%                  | 17.25%                  |
| <b>1:6</b>            | -                       | -                       | -                       | -                       | 3.47%                   |
| <b>1:7</b>            | -                       | -                       | -                       | -                       | -                       |

$\beta$ -pinene hydrogenation process Single-factor examination:

| <b>Stir</b>                 | <b>600r/min</b> | <b>700r/min</b> | <b>750r/min</b> | <b>800r/min</b> | <b>850r/min</b> |
|-----------------------------|-----------------|-----------------|-----------------|-----------------|-----------------|
| <b>600r/min</b>             | -               | 17.40%          | 43.10%          | 40.57%          | 6.58%           |
| <b>700r/min</b>             | -               | -               | 25.70%          | 23.17%          | 10.82%          |
| <b>750r/min</b>             | -               | -               | -               | 2.53%           | 36.52%          |
| <b>800r/min</b>             | -               | -               | -               | -               | 33.99%          |
| <b>850r/min</b>             | -               | -               | -               | -               | -               |
| <b>Pressure</b>             | <b>2MPa</b>     | <b>2.5MPa</b>   | <b>3.0MPa</b>   | <b>4.0MPa</b>   | <b>5.0MPa</b>   |
| <b>2MPa</b>                 | -               | 1.25%           | 2.81%           | 2.23%           | 8.34%           |
| <b>2.5MPa</b>               | -               | -               | 1.56%           | 3.48%           | 9.59%           |
| <b>3.0MPa</b>               | -               | -               | -               | 5.04%           | 11.15%          |
| <b>4.0MPa</b>               | -               | -               | -               | -               | 6.11%           |
| <b>5.0MPa</b>               | -               | -               | -               | -               | -               |
| <b>wt%</b>                  | <b>3wt%</b>     | <b>4wt%</b>     | <b>5wt%</b>     | <b>6wt%</b>     | <b>7wt%</b>     |
| <b>3wt%</b>                 | -               | 5.13%           | 5.76%           | 5.16%           | 1.15%           |
| <b>4wt%</b>                 | -               | -               | 0.63%           | 0.03%           | 3.98%           |
| <b>5wt%</b>                 | -               | -               | -               | 0.60%           | 4.61%           |
| <b>6wt%</b>                 | -               | -               | -               | -               | 4.01%           |
| <b>7wt%</b>                 | -               | -               | -               | -               | -               |
| <b>Reaction Temperature</b> | <b>100°C</b>    | <b>110°C</b>    | <b>140°C</b>    | <b>130°C</b>    | <b>120°C</b>    |
| <b>100°C</b>                | -               | 4.26%           | 11.16%          | 5.55%           | 7.73%           |
| <b>110°C</b>                | -               | -               | 15.42%          | 1.29%           | 3.15%           |
| <b>140°C</b>                | -               | -               | -               | 16.71%          | 18.57%          |
| <b>130°C</b>                | -               | -               | -               | -               | 1.86%           |

Criteria for Gaussian 16:

Partial citation of references 54:

54. Frisch, M. J.; Trucks, G. W.; Schlegel, H. B.; Scuseria, G. E.; Robb, M. A.; Cheeseman, J. R.; Scalmani, G.; Barone, V.; Petersson, G. A.; Nakatsuji, H.; Li, X.; Caricato, M.; Marenich, A. V.; Bloino, J.; Janesko, B. G.; Gomperts, R.; Mennucci, B.; Hratchian, H. P.; Ortiz, J. V.; Izmaylov, A. F.; Sonnenberg, J. L.; Williams; Ding, F.; Lipparini, F.; Egidi, F.; Goings, J.; Peng, B.; Petrone, A.; Henderson, T.; Ranasinghe, D.; Zakrzewski, V. G.; Gao, J.; Rega, N.; Zheng, G.; Liang, W.; Hada, M.; Ehara, M.; Toyota, K.; Fukuda, R.; Hasegawa, J.; Ishida, M.; Nakajima, T.; Honda, Y.; Kitao, O.; Nakai, H.; Vreven, T.; Throssell, K.; Montgomery Jr., J. A.; Peralta, J. E.; Ogliaro, F.; Bearpark, M. J.; Heyd, J. J.; Brothers, E. N.; Kudin, K. N.; Staroverov, V. N.; Keith, T. A.; Kobayashi, R.; Normand, J.; Raghavachari, K.; Rendell, A. P.; Burant, J. C.; Iyengar, S. S.; Tomasi, J.; Cossi, M.; Millam, J. M.; Klene, M.; Adamo, C.; Cammi, R.; Ochterski, J. W.; Martin, R. L.; Morokuma, K.; Farkas, O.; Foresman, J. B.; Fox, D. J. *Gaussian 16 Rev. C.01*, Wallingford, CT, 2016.

Atoms Coordinates :

NiB<sub>2</sub>

Symbolic Z-matrix:

Charge=0 Multiplicity=1

|    |          |          |        |
|----|----------|----------|--------|
| B  | -0.23754 | 0.19435  | 0.000  |
| B  | 0.30346  | 1.72035  | 0.074  |
| Ni | -1.32254 | 1.49135  | -1.074 |
| H  | -0.09854 | -1.09665 | 0.376  |
| H  | 1.21146  | 2.59835  | 0.555  |

Ni<sub>2</sub>B<sub>2</sub>

Symbolic Z-matrix:

Charge=0 Multiplicity=1

|    |         |          |        |
|----|---------|----------|--------|
| B  | 0.10797 | 0.04319  | 0.000  |
| B  | 1.62497 | -0.76981 | -0.256 |
| Ni | 0.32797 | -1.70781 | 0.955  |
| Ni | 0.07897 | -1.45281 | -1.338 |

Ni<sub>3</sub>B<sub>2</sub>

Symbolic Z-matrix:

Charge=0 Multiplicity=1

|    |          |          |        |
|----|----------|----------|--------|
| B  | -0.15116 | 0.08638  | 0.000  |
| B  | 0.07384  | -1.84862 | 0.000  |
| Ni | -2.14116 | -1.12562 | 0.000  |
| Ni | -0.47816 | -0.93262 | -1.478 |
| Ni | -0.47816 | -0.93262 | 1.478  |

Ni<sub>4</sub>B<sub>2</sub>

Symbolic Z-matrix:

Charge=0 Multiplicity=1

|    |          |          |        |
|----|----------|----------|--------|
| Ni | 0.15116  | 0.06478  | 0.000  |
| Ni | 2.68416  | -0.35522 | -0.06  |
| Ni | -0.26984 | -2.46922 | -0.06  |
| Ni | 2.26316  | -2.88922 | -0.12  |
| B  | 1.18916  | -1.38622 | -1.016 |
| B  | 1.22516  | -1.43822 | 0.896  |
